# Supplementary material for: Health Risk in a Geographic Area of Thailand with Endemic Cadmium Contamination: Focus on Albuminuria
Source: Toxics. 2023 Jan 11;11(1):68. doi: 10.3390/toxics11010068 (PMC9866753; doi:10.3390/toxics11010068)
Supplement: Supplementary file 1 [file toxics-11-00068-s001.zip › Correction SM_toxics-2136321.pdf]

# Supplemental Material: Health Risk in a Geographic Area of Thailand with Endemic Cadmium Contamination: Focus on Albuminuria

Soisungwan Satarug, David A. Vesey, Glenda C. Gobe, Supabhorn Yimthiang and Aleksandra Buha Đorđević

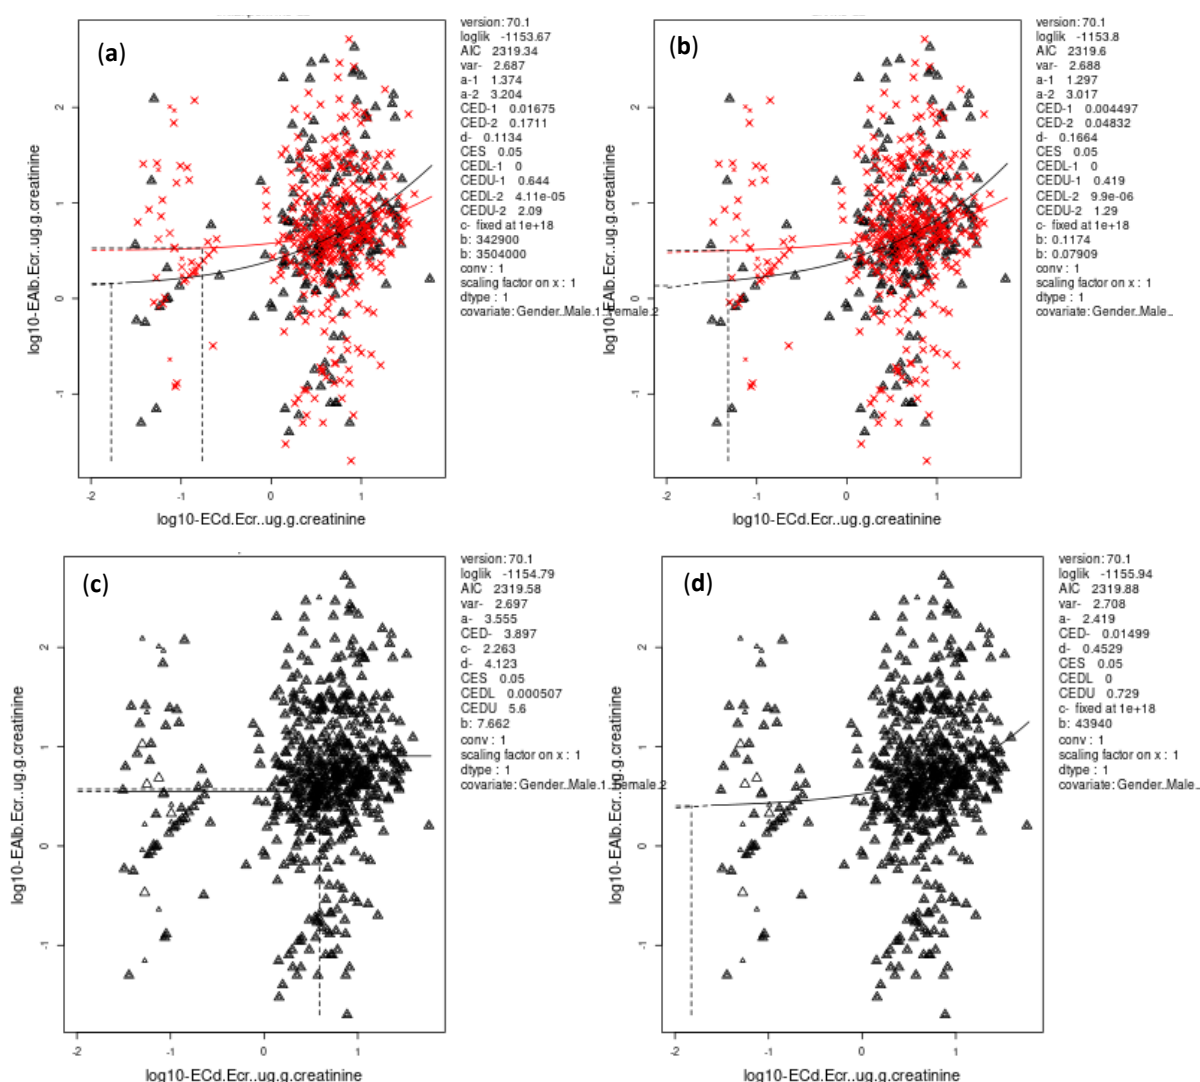

(e)

| 5% Increase of $E_{alb}/E_{Cr}$ | BMDL                  |      | U/L               |
|---------------------------------|-----------------------|------|-------------------|
|                                 | BMDU                  |      |                   |
| Men                             | $4.16 \times 10^{-6}$ | 2.29 | $5.5 \times 10^5$ |
| Women                           | $3.89 \times 10^{-4}$ | 3.41 | $8.8 \times 10^3$ |

BMDL and BMDU values of  $E_{Cd}/E_{Cr}$  were in  $\mu\text{g/g}$  creatinine. CI, confidence; U/L, BMDU/BMDL ratio.

**Figure S1.** Dose-effect relationship of  $E_{Cd}/E_{Cr}$  and  $E_{alb}/E_{Cr}$ . Data were fitted to 4 dose-response models; (a) an inverse exponential model; (b) a natural logarithmic model; (c) an exponential model; and (d) Hill model. The BMDL/BMDU values of  $E_{Cd}/E_{Cr}$  corresponded to a 5% increase in  $E_{alb}/E_{Cr}$  in men and women (e).

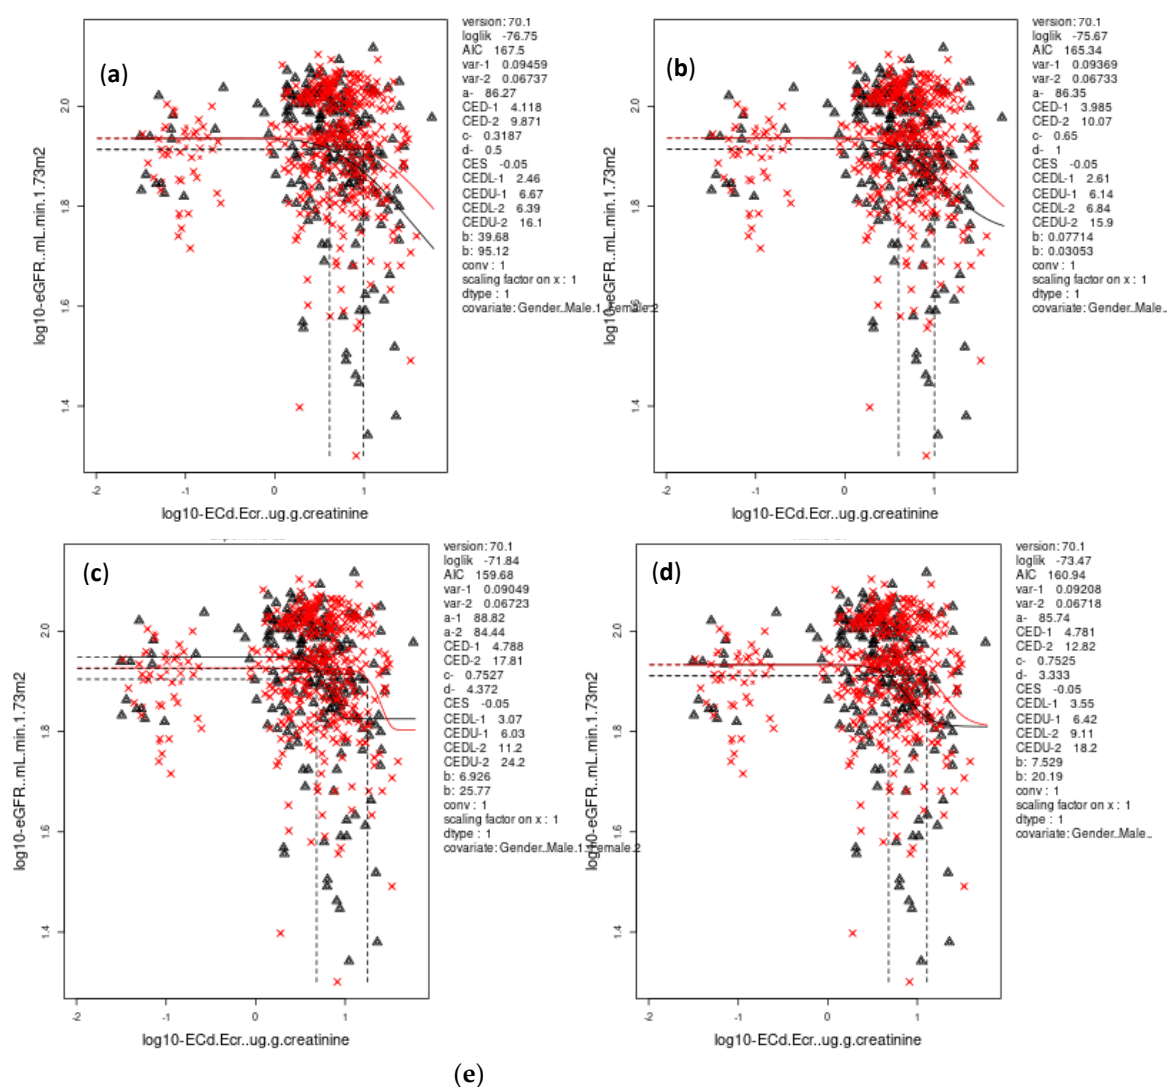

| 5% Decrease of eGFR | BMDL |      | U/L  |
|---------------------|------|------|------|
|                     | BMDU |      |      |
| Men                 | 2.07 | 6.93 | 3.35 |
| Women               | 6.82 | 21.7 | 3.81 |

BMDL and BMDU values of  $E_{cd}/E_{cr}$  were in  $\mu\text{g/g}$  creatinine.  
CI, confidence interval; U/L, BMDU/BMDL ratio.

**Figure S2.** Dose-effect relationship of  $E_{cd}/E_{cr}$  and eGFR. Data were fitted to 4 dose-response models; (a) an inverse exponential model; (b) a natural logarithmic model; (c) an exponential model; and (d) Hill model. The BMDL/BMDU values of  $E_{cd}/E_{cr}$  corresponded to a 5% decrease of eGFR (e).

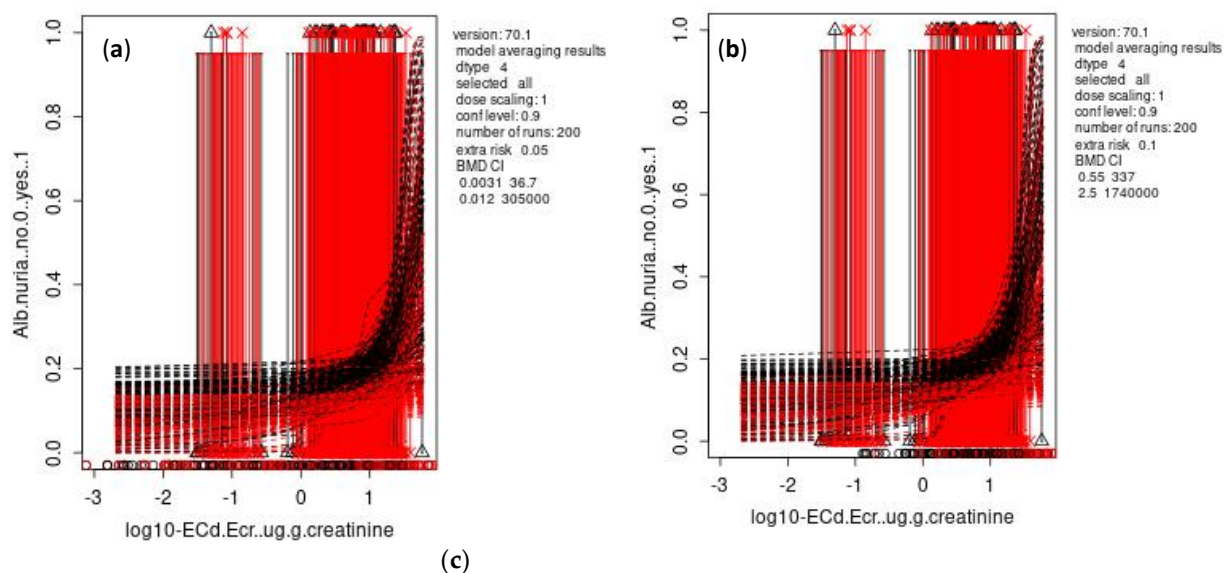

| Endpoint                      | BMDL                  | BMDU               | U/L               |
|-------------------------------|-----------------------|--------------------|-------------------|
| 5% Prevalence of albuminuria  |                       |                    |                   |
| Men                           | $3.06 \times 10^{-3}$ | 36.7               | $1.2 \times 10^2$ |
| Women                         | $1.22 \times 10^{-2}$ | $3.05 \times 10^5$ | $2.5 \times 10^7$ |
| 10% Prevalence of albuminuria |                       |                    |                   |
| Men                           | 0.55                  | 337                | 612               |
| Women                         | 2.52                  | $1.74 \times 10^6$ | $6.7 \times 10^5$ |

BMDL and BMDU values of  $E_{Cd}/E_{Cr}$  were in  $\mu\text{g/g}$  creatinine. CI, confidence interval; U/L, BMDU/BMDL ratio. Albuminuria was defined as urinary albumin-to-creatinine ratios  $\geq 20$  mg /g for men, and  $\geq 30$  mg/g for women.

**Figure S3.** Dose-effect relationship of  $E_{Cd}/E_{Cr}$  and albuminuria prevalence. Bootstrap model averaging of  $E_{Cd}/E_{Cr}$  values corresponded to an increase of albuminuria prevalence by 5% (a) and 10% (b). BMDL/BMDU values of  $E_{Cd}/E_{Cr}$  corresponded with 5% and 10% increases in prevalence of albuminuria (c).

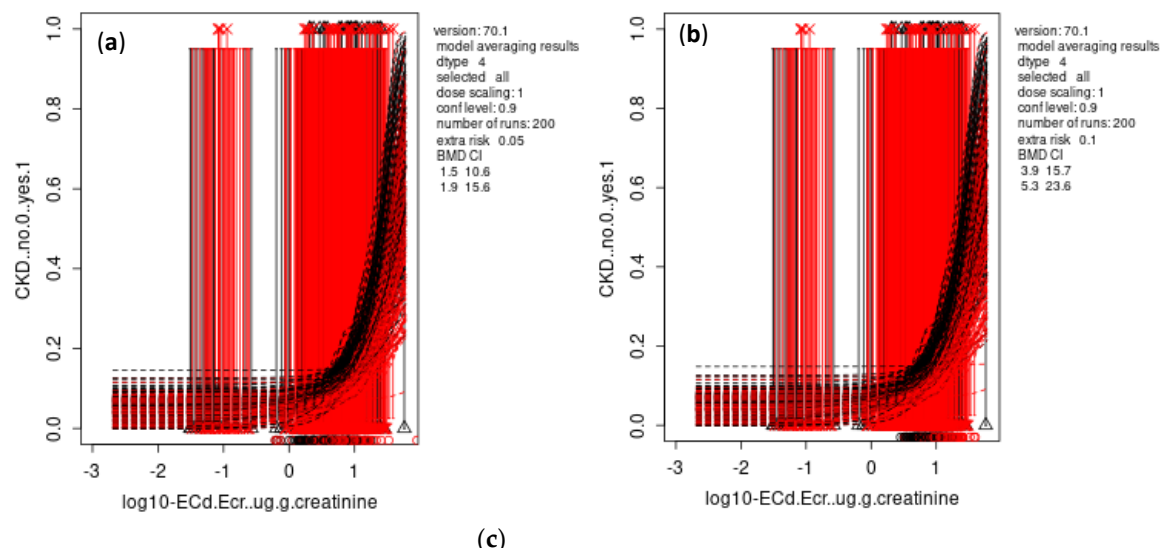

BMDL and BMDU values of  $E_{Cd}/E_{Cr}$  were in  $\mu\text{g/g}$  creatinine. CI, confidence interval; U/L, BMDU/BMDL ratio. Reduced eGFR was defined as  $eGFR \leq 60 \text{ mL/min/1.73 m}^2$ .

**Figure S4.** Dose-effect relationship of  $E_{Cd}/E_{Cr}$  and prevalence of reduced eGFR. Bootstrap model averaging of  $E_{Cd}/E_{Cr}$  values corresponded to an increase of albuminuria prevalence by 5% (a) and 10% (b). The BMDL/BMDU values of  $E_{Cd}/E_{Cr}$  corresponded with 5% and 10% increases in prevalence of albuminuria (c).

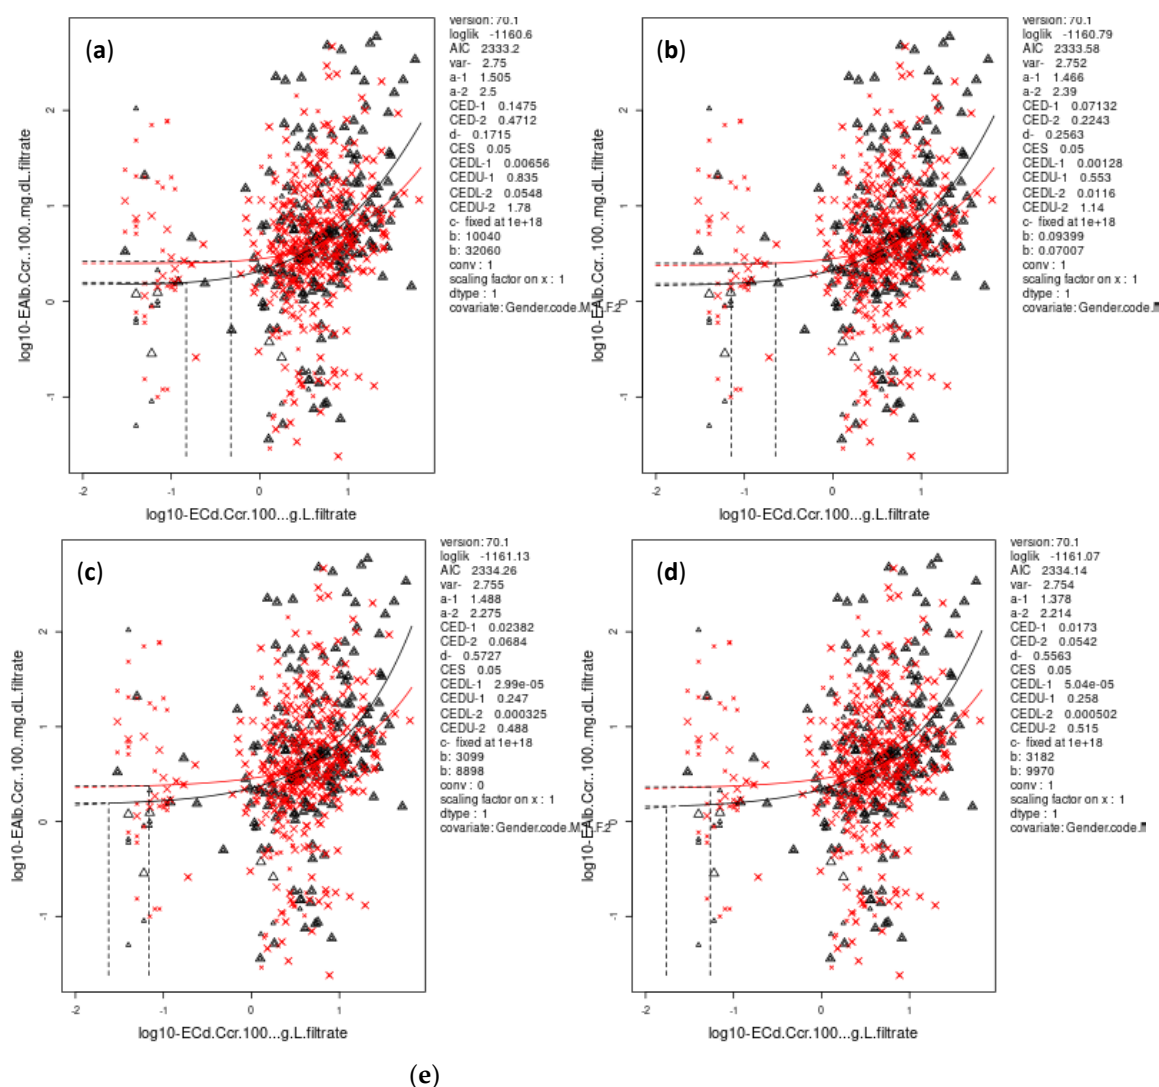

(e)

|       | 5% Increase of $E_{alb}/C_{Cr}$ | BMDL    | BMDU | U/L   |
|-------|---------------------------------|---------|------|-------|
| Men   |                                 | 0.00053 | 1.11 | 2,094 |
| Women |                                 | 0.00357 | 2.09 | 585   |

BMDL and BMDU values of  $E_{Cd}/C_{Cr} \times 100$  were in  $\mu g/L$  filtrate.

**Figure S5.** Dose-effect relationship of  $E_{Cd}/C_{Cr}$  and  $E_{Alb}/C_{Cr}$ . Data were fitted to 4 dose-response models; (a) an inverse exponential model; (b) a natural logarithmic model; (c) an exponential model; and (d) Hill model. The BMDL/BMDU values of  $E_{Cd}/C_{Cr}$  corresponded with a 5% increase in  $E_{Alb}/C_{Cr}$  (e).

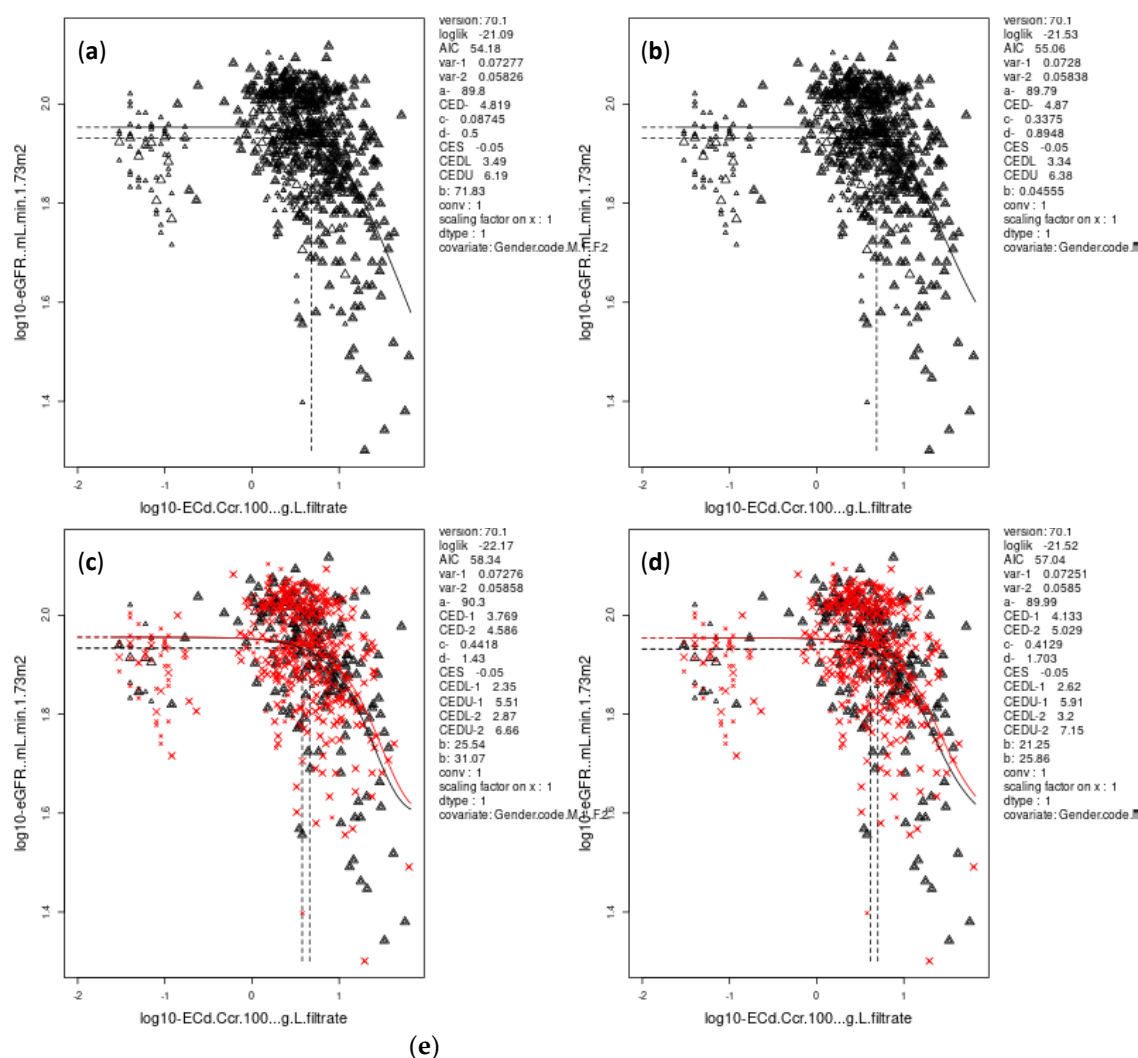

| 5% Decrease of eGFR | BMDL<br>BMDU |      | U/L  |
|---------------------|--------------|------|------|
| Men                 | 2.15         | 6.71 | 3.12 |
| Women               | 2.15         | 6.56 | 3.05 |

BMDL and BMDU values of  $E_{cd}/C_{cr} \times 100$  were in  $\mu\text{g}/\text{L}$  filtrate.  
CI, confidence interval; U/L, BMDU/BMDL ratio.

**Figure S6.** Dose-effect relationship of  $E_{cd}/C_{cr}$  and eGFR. Data were fitted to 4 dose-response models; (a) an inverse exponential model; (b) a natural logarithmic model; (c) an exponential model; and (d) Hill model. The BMDL/BMDU values of  $E_{cd}/C_{cr}$  corresponded to a 5% decrease of eGFR (e).

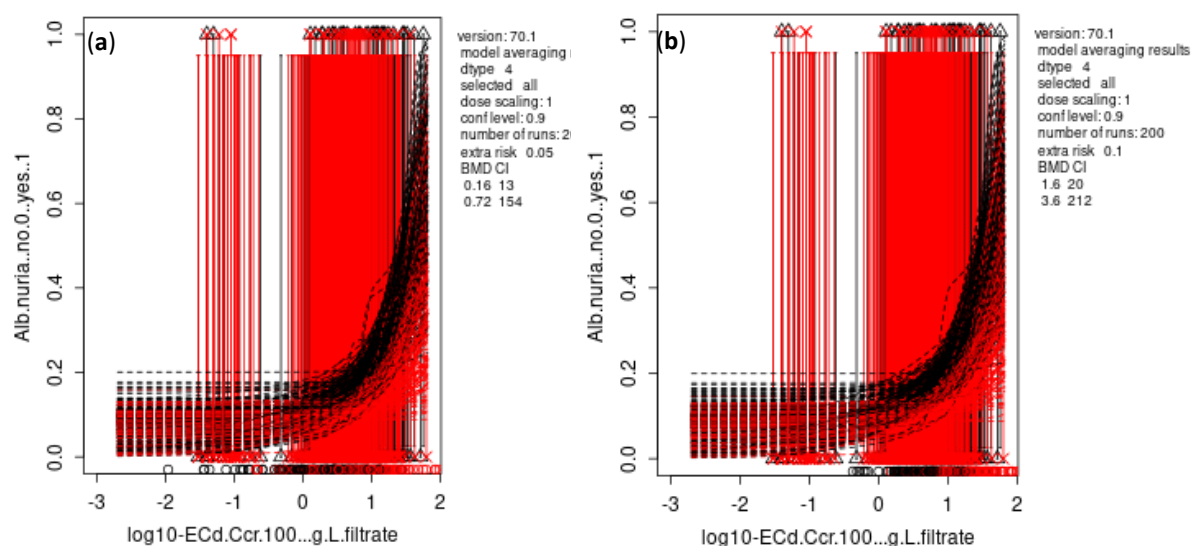

(c)

| Endpoint                      | BMDL  | BMDU | U/L |
|-------------------------------|-------|------|-----|
| 5% Prevalence of albuminuria  |       |      |     |
| Men                           | 0.163 | 13   | 80  |
| Women                         | 0.718 | 154  | 214 |
| 10% Prevalence of albuminuria |       |      |     |
| Men                           | 1.65  | 20   | 12  |
| Women                         | 3.55  | 212  | 60  |

BMDL and BMDU values of  $E_{Cd}/C_{Cr}$  were in  $\mu\text{g/L}$  filtrate. CI, confidence interval; U/L, BMDU/BMDL ratio. Albuminuria was defined as  $E_{alb}/C_{Cr} \times 100 \geq 20$  mg/L filtrate for men, and  $\geq 30$  mg/L for women.

**Figure S7.** Dose-effect relationship of  $E_{Cd}/C_{Cr}$  and albuminuria prevalence. Bootstrap curves for BMD model averaging of  $E_{Cd}/C_{Cr}$  values corresponded to an increase of albuminuria prevalence by 5% (a) and 10% (b). BMDL/BMDU values of  $E_{Cd}/C_{Cr}$  corresponded with 5% and 10% increases in prevalence of albuminuria (e).

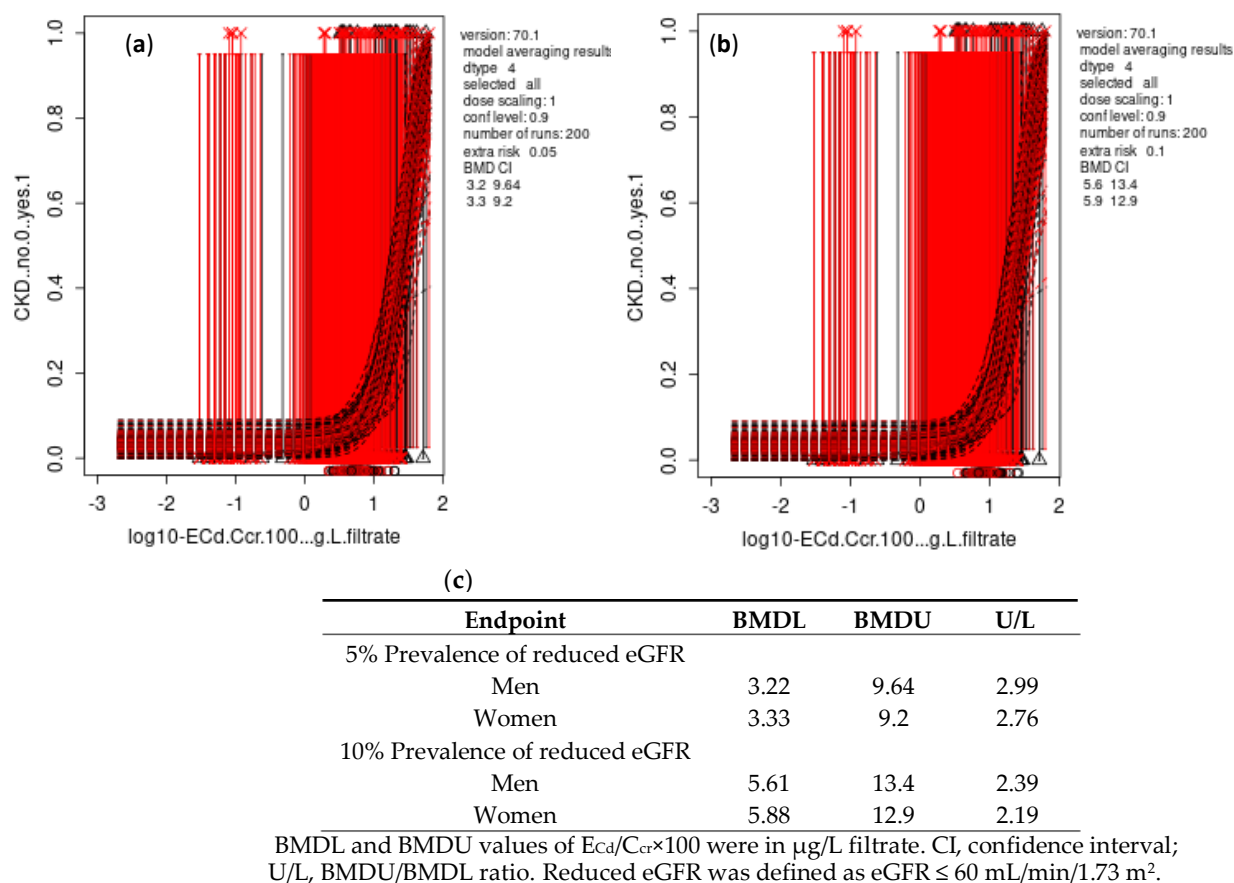

**Figure S8.** Dose-effect relationship of  $E_{Cd}/C_{Cr}$  and prevalence of reduced eGFR. Bootstrap curves for model averaging of  $E_{Cd}/C_{Cr}$  values corresponded to an increase of prevalence of reduced eGFR by 5% (a) and 10% (b). The BMDL/BMDU values of  $E_{Cd}/C_{Cr}$  corresponded with 5% and 10% increases in prevalence of reduced eGFR (c).
